# Supplementary material for: Triallyl cyanurate copolymerization delivered nonflammable and fast ion conducting elastic polymer electrolytes
Source: Royal Society of Chemistry journal article supplement (doi:10.1039/d2ta06723d), 2022-01-01
Supplement: d2ta06723d1.pdf [file d2ta06723d1.pdf]

## Supporting Information

### **Triallyl cyanurate copolymerization delivered nonflammable and fast ion conduction elastic polymer electrolyte**

*Dashan Zhang*<sup>ab</sup>, *Yongzheng Shi*<sup>ab</sup>, *Junwei An*<sup>cd</sup>, *Shubin Yang*<sup>a</sup>, *Bin Li*<sup>\*ab</sup>

<sup>a</sup> School of Materials Science & Engineering, Beihang University, Beijing, China

<sup>b</sup> State Key Laboratory of Powder Metallurgy, Central South University, Changsha, China

<sup>c</sup> School of Chemistry and Chemical Engineering, Jining Normal University, No. 59 Gongnong Street, Wulanchabu City, Inner Mongolia Autonomous Region, China

<sup>d</sup> Inner Mongolia Qingmeng Graphene Technology Co., Ltd. China Graphite Application Industrial Park, Xingwangjiao Industrial Park, Xinghe County, Wulanchabu City, Inner Mongolia Autonomous Region, China

\* Corresponding author:

E-mail addresses: [li\\_bin@buaa.edu.cn](mailto:li_bin@buaa.edu.cn)

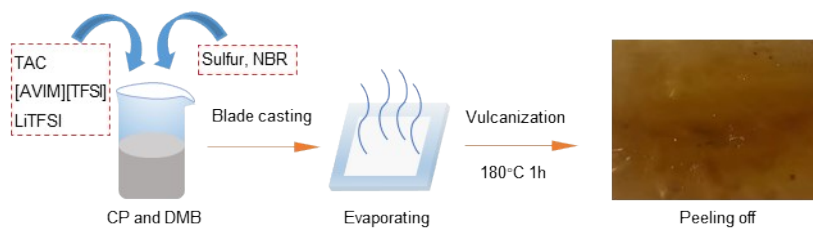

Figure S1. Schematic of synthetic processes of v-NBR/TAC/IL electrolyte membrane.

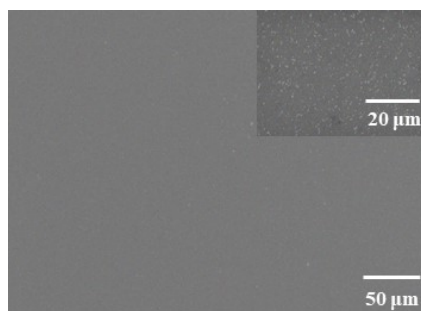

Figure S2. SEM image of the surface of v-NBR/TAC/IL electrolyte membrane.

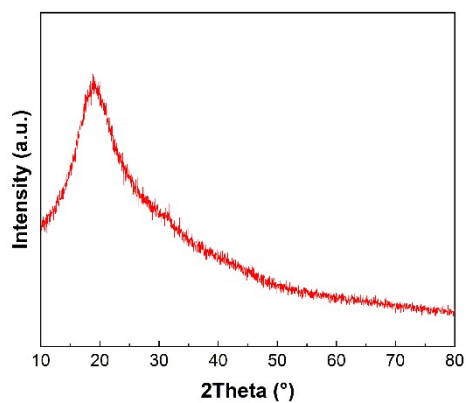

Figure S3. XRD spectra of v-NBR/TAC/IL electrolyte.

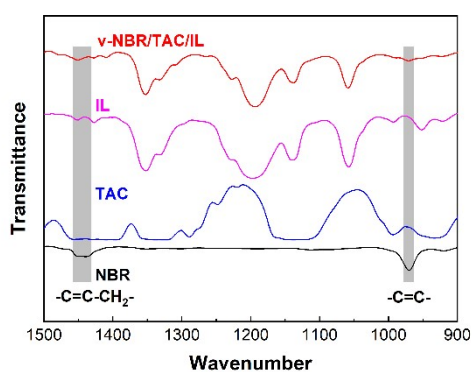

Figure S4. Enlarged Fourier Transform Infrared (FTIR) spectra of the NBR, TAC, IL and v-NBR/TAC/IL electrolyte.

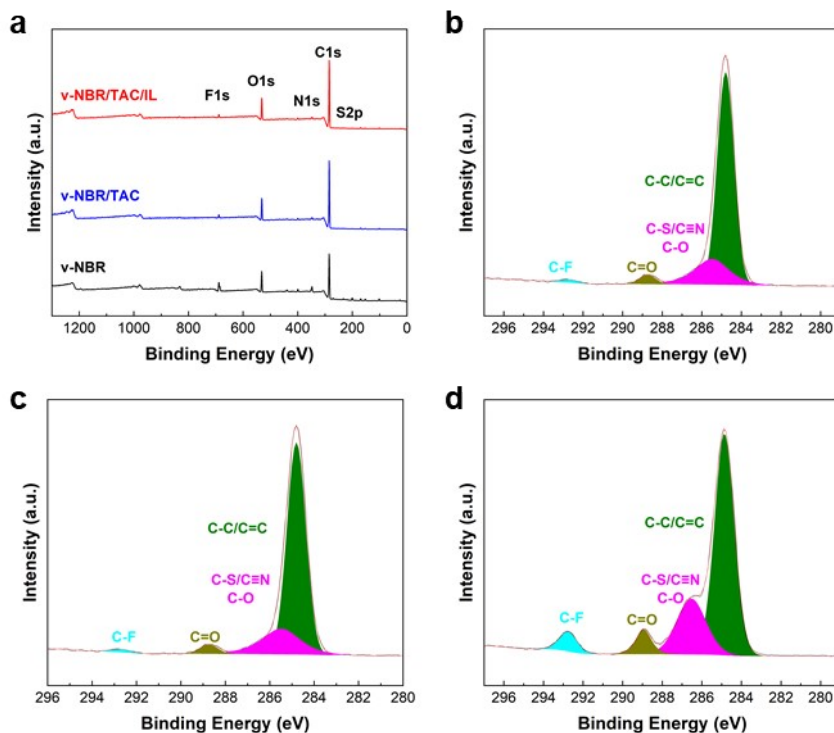

Figure S5. (a) XPS spectrum of SPEs. And comparison of C 1s spectrum among the (b) v-NBR electrolyte, (c) v-NBR/TAC electrolyte and (d) v-NBR/TAC/IL electrolyte.

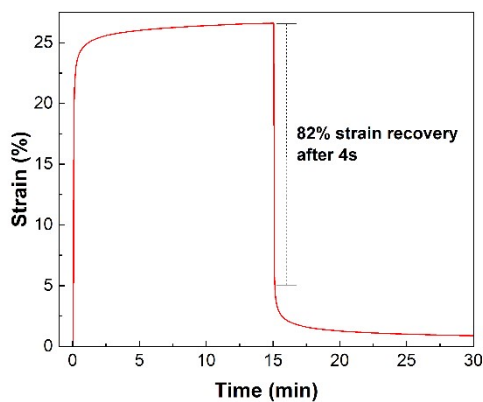

Figure S6. Creep test of v-NBR/TAC/IL electrolyte membrane.

The membrane can rapidly recover from large strains, demonstrating its high elasticity and resilience.

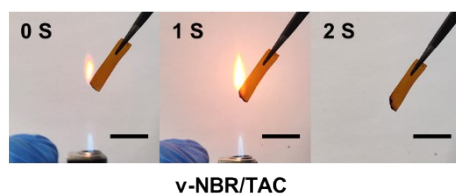

Figure S7. Flame tests of v-NBR/TAC electrolyte membrane. Scale bars, 1 cm.

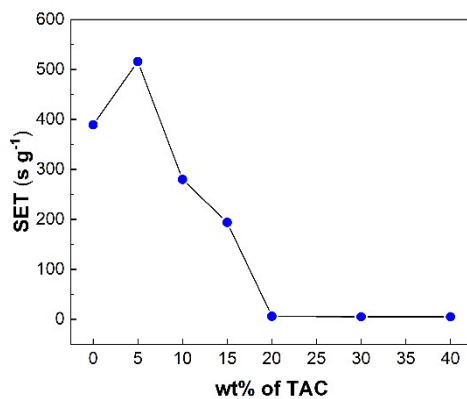

Figure S8. The SET of v-NBR/TAC electrolyte with different weight percentages of TAC.

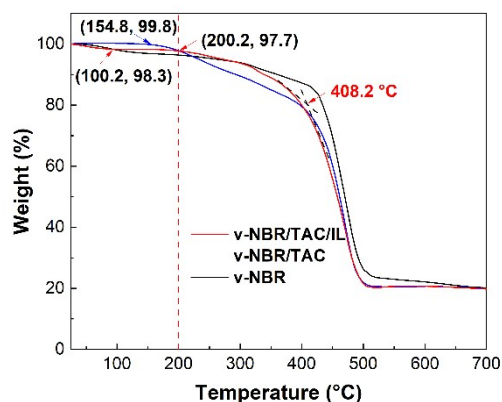

Figure S9. TGA thermograms of SPEs at N<sub>2</sub> atmosphere.

The v-NBR/TAC/IL electrolyte suffers only ~2.3 wt.% mass drop from room temperature to 200 °C, corresponding to the decomposition of a few small molecules in the electrolyte. Compared with v-NBR/TAC electrolyte and v-NBR electrolyte, it can be proved that v-NBR/TAC/IL electrolyte has high thermal stability.

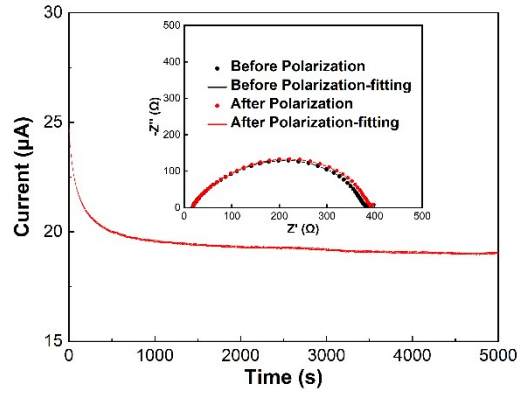

Figure S10. Lithium transference number measurements of v-NBR/TAC/IL electrolyte.

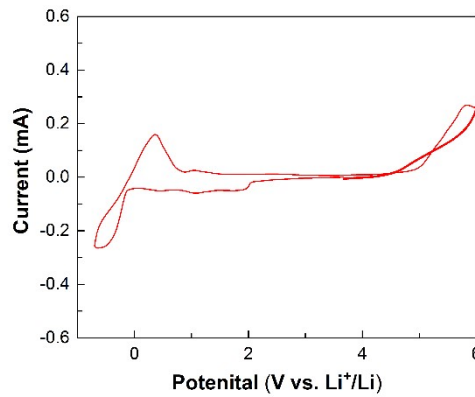

Figure S11. CV curves of Li|v-NBR/TAC/IL|ss.

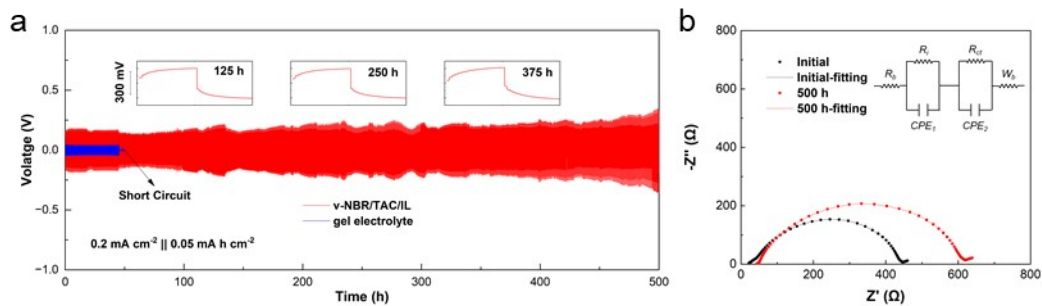

Figure S12. (a) Long-term cycling tests of Li plating/stripping for Li-Li symmetrical batteries with v-NBR/TAC/IL electrolyte and gel electrolyte at current densities of  $0.2 \text{ mA cm}^{-2}$  for  $0.05 \text{ mA h cm}^{-2}$  at room temperature. And (b) corresponding EIS plots with v-NBR/TAC/IL electrolyte.

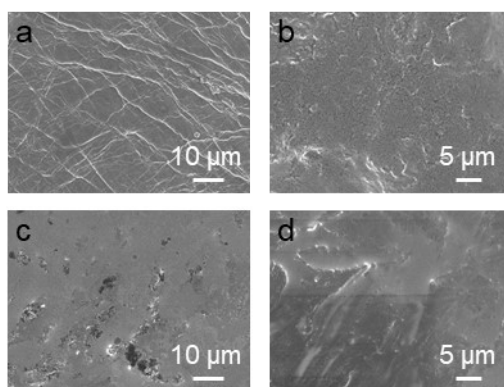

Figure S13. SEM images of metallic lithium anodes after cycling (a-b) at  $0.05 \text{ mA cm}^{-2}$  for 1500 h and (c-d) at  $0.2 \text{ mA cm}^{-2}$  for 500 h at room temperature.

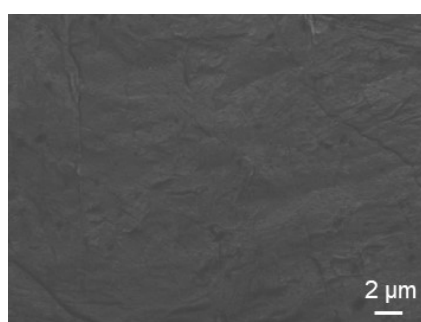

Figure S14. SEM images of the surface for metallic lithium anode with v-NBR/TAC/IL electrolyte after cycling at various current densities from  $0.05$  to  $1 \text{ mA cm}^{-2}$  at  $0.05 \text{ mAh cm}^{-2}$  at room temperature.

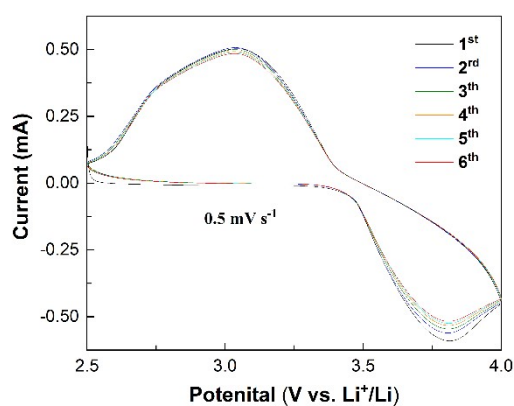

Figure S15. CV curves of Li-LiFePO<sub>4</sub> full battery with v-NBR/TAC/IL electrolyte at a scan rate of  $0.5 \text{ mV s}^{-1}$  at room temperature.

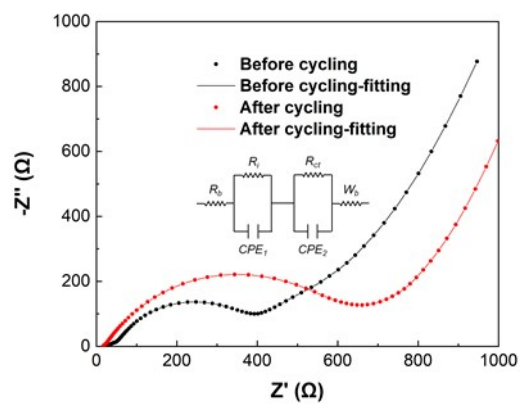

Figure S16. EIS plot of Li-LiFePO<sub>4</sub> full battery of v-NBR/TAC/IL before and after cycling at 0.5 C.

Table S1. Basic properties of flame retardant SPEs in this work compared with others

| Electrolyte                            | Thickness<br>( $\mu\text{m}$ ) | Ionic conductivity<br>( $\text{S cm}^{-1}$ ) | Mechanical<br>strength (MPa) | Reference |
|----------------------------------------|--------------------------------|----------------------------------------------|------------------------------|-----------|
| <b>PI/DBDPE/PEO/LiTFSI</b>             | 10~65                          | $6.7 \times 10^{-6}$ (30 °C)                 | 440                          | 1         |
| <b>PEGBCDMA</b>                        | -                              | $\sim 10^{-6}$                               | 0.24                         | 2         |
| <b>Polyphosphoester<br/>copolymers</b> | -                              | $2 \times 10^{-4}$ (70 °C)                   | -                            | 3         |
| <b>ADP/PEO/LiTFSI</b>                  | ~100                           | $3.7 \times 10^{-5}$ (30 °C)                 | -                            | 4         |
| <b>PI/PEO/LiTFSI</b>                   | 8.6                            | $1.4 \times 10^{-4}$ (25 °C)                 | -                            | 5         |
| <b>Poly-DOL</b>                        | ~25                            | $0.98 \times 10^{-4}$ (30 °C)                | -                            | 6         |
| <b>SHSPE3</b>                          | -                              | $\sim 5 \times 10^{-5}$ (60 °C)              | -                            | 7         |
| <b>PGPE-4000</b>                       | -                              | $5.85 \times 10^{-5}$ (RT)                   | -                            | 8         |
| <b>FR-PU-20% Li</b>                    | -                              | $1.51 \times 10^{-4}$ (70 °C)                | 1.26                         | 9         |
| <b>v-NBR/TAC</b>                       | ~65                            | $9.6 \times 10^{-7}$ (RT)                    | 0.68                         | This work |
| <b>v-NBR/TAC/IL</b>                    | ~65                            | $2.2 \times 10^{-4}$ (RT)                    | 0.52                         | This work |



## Reference.

1. Y. Cui, J. Wan, Y. Ye, K. Liu, L. Y. Chou and Y. Cui, *Nano Lett.*, 2020, **20**, 1686-1692.
2. G. Fu, M. D. Soucek and T. Kyu, *Solid State Ionics*, 2018, **320**, 310-315.
3. J. L. Olmedo-Martínez, L. Meabe, R. Riva, G. Guzmán-González, L. Porcarelli, M. Forsyth, A. Mugica, I. Calafel, A. J. Müller, P. Lecomte, C. Jérôme and D. Mecerreyes, *Polym. Chem.*, 2021, **12**, 3441-3450.
4. L. Han, C. Liao, X. Mu, N. Wu, Z. Xu, J. Wang, L. Song, Y. Kan and Y. Hu, *Nano Lett.*, 2021, **21**, 4447-4453.
5. J. Wan, J. Xie, X. Kong, Z. Liu, K. Liu, F. Shi, A. Pei, H. Chen, W. Chen, J. Chen, X. Zhang, L. Zong, J. Wang, L. Q. Chen, J. Qin and Y. Cui, *Nat. Nanotechnol.*, 2019, **14**, 705-711.
6. J. Xiang, Y. Zhang, B. Zhang, L. Yuan, X. Liu, Z. Cheng, Y. Yang, X. Zhang, Z. Li, Y. Shen, J. Jiang and Y. Huang, *Energy Environ. Sci.*, 2021, **14**, 3510-3521.
7. C. Wang, R. Li, P. Chen, Y. Fu, X. Ma, T. Shen, B. Zhou, K. Chen, J. Fu, X. Bao, W. Yan and Y. Yang, *J. Mater. Chem. A*, 2021, **9**, 4758-4769.
8. X. Zhang, C. Wang, W. Zhao, M. Han, J. Sun and Q. Wang, *Eur. Polym. J.*, 2022, **176**, 111400-111409.
9. J. Chen, Z. Liu, J. Liu, X. Liu, X. Yang and X. Jiang, *Mater. Chem. Phys.*, 2022, **279**.
